# Supplementary material for: Long-term optical brain imaging in live adult fruit flies
Source: PubMed Central journal article supplement (PMC5830414; doi:10.1038/s41467-018-02873-1), 2018-02-28
Supplement: 41467_2018_2873_MOESM2_ESM.pdf [file 41467_2018_2873_MOESM2_ESM.pdf]

## **Description of Additional Supplementary Files**

File Name: Supplementary Movie 1

Description: Mounting and releasing a fly for a surgery or imaging session
